# Supplementary material for: The Fragment HMGA2-sh-3p20 from HMGA2 mRNA 3′UTR Promotes the Growth of Hepatoma Cells by Upregulating HMGA2
Source: PubMed Central journal article supplement (PMC5437003; doi:10.1038/s41598-017-02311-0), 2017-05-18
Supplement: 41598_2017_2311_MOESM1_ESM.pdf [file 41598_2017_2311_MOESM1_ESM.pdf]

# **The Fragment HMGA2-sh-3p20 from HMGA2 mRNA 3'UTR Promotes the Growth of Hepatoma Cells by Upregulating HMGA2**

Yuan Wang<sup>1</sup>, Fuquan Chen<sup>1</sup>, Zhe Yang<sup>1</sup>, Man Zhao<sup>1</sup>, Shuqin Zhang<sup>1</sup>, Yuen Gao<sup>1</sup>, Jinyan Feng<sup>1</sup>,  
Guang Yang<sup>1</sup>, Weiyong Zhang<sup>1</sup>, Lihong Ye<sup>2\*</sup> and Xiaodong Zhang<sup>1\*</sup>

<sup>1</sup> State Key Laboratory of Medicinal Chemical Biology, Department of Cancer Research, College of Life Sciences, Nankai University, Tianjin 300071, China.

<sup>2</sup> State Key Laboratory of Medicinal Chemical Biology, Department of Biochemistry, College of Life Sciences, Nankai University, Tianjin 300071, China.

\* Correspondence and requests for materials should be addressed to X.Z. (email: zhangxd@nankai.edu.cn.) or L.Y. (e-mail: yelihong@nankai.edu.cn.)

**Supplementary Information:**

**Supplementary Figures**

**Supplementary Figures Legends**

**Supplementary Tables**

Supplementary Figure S1. A hairpin within HMGA2 mRNA 3'UTR has regulatory function

**A**

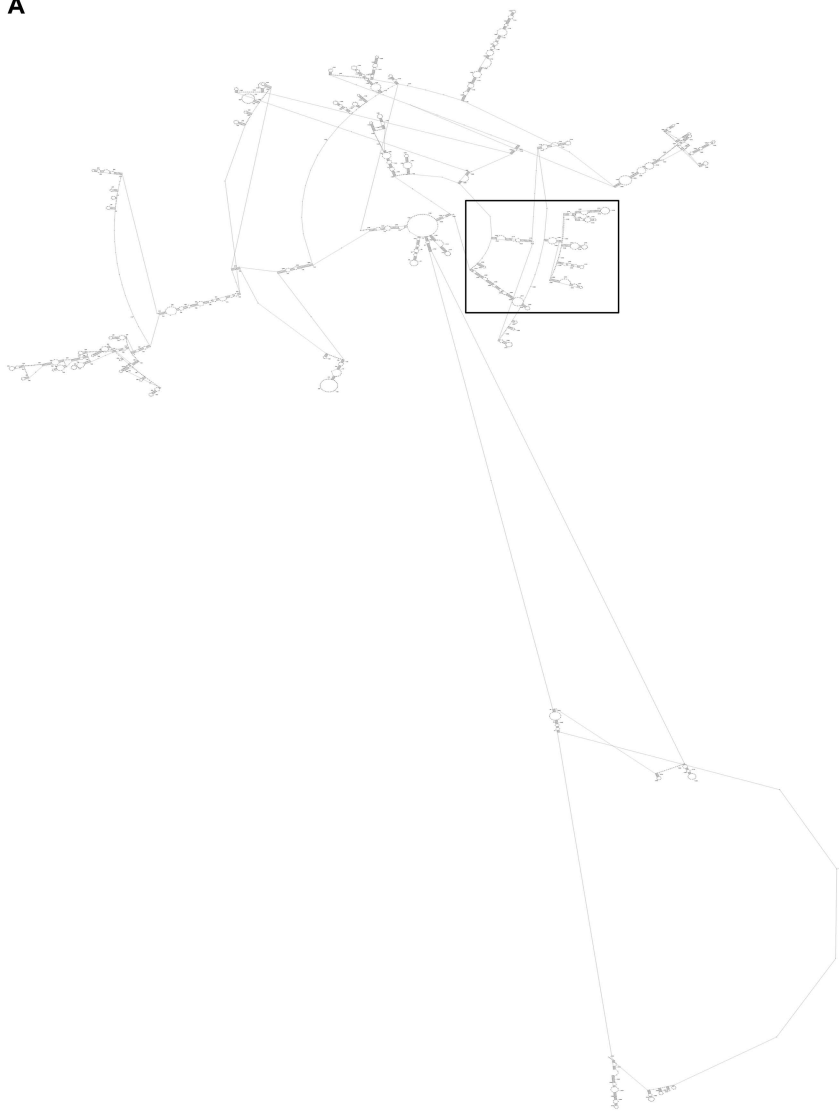

Supplementary Figure S1. A hairpin within HMGA2 mRNA 3'UTR has regulatory function

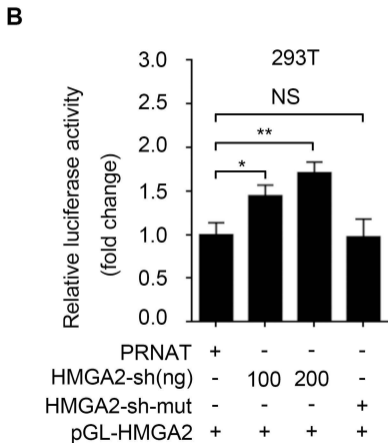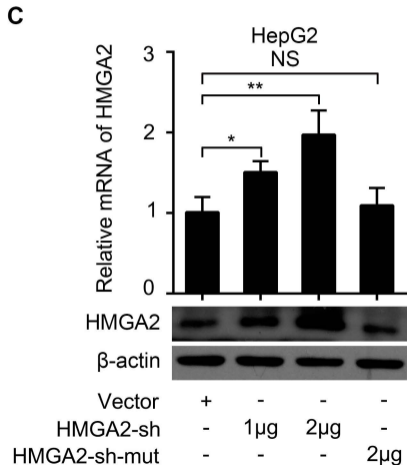

Supplementary Figure S2. HMGA2-sh-3p20 is cleaved from HMGA2-sh by Drosha/DGCR8 complex and Dicer

**A**

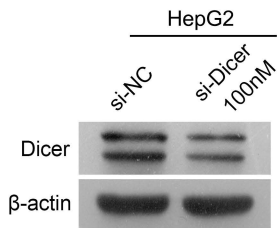

**B**

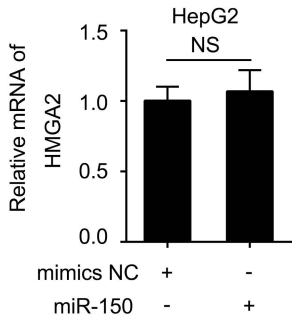

**C**

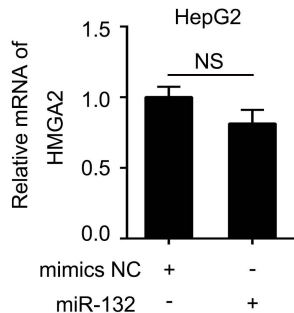

**D**

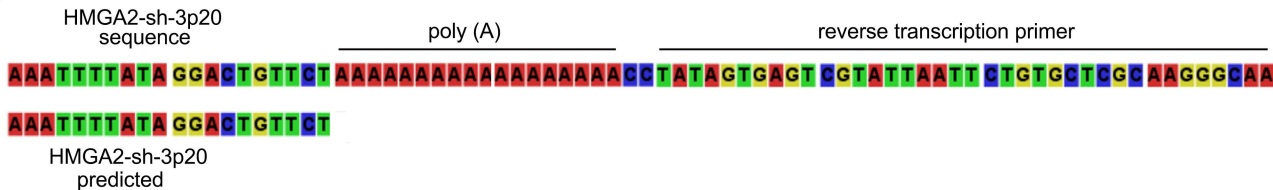

Supplementary Figure S3. HMGA2-sh-3p20 upregulates HMGA2 by blocking the TTP-mediated degradation of HMGA2 mRNA

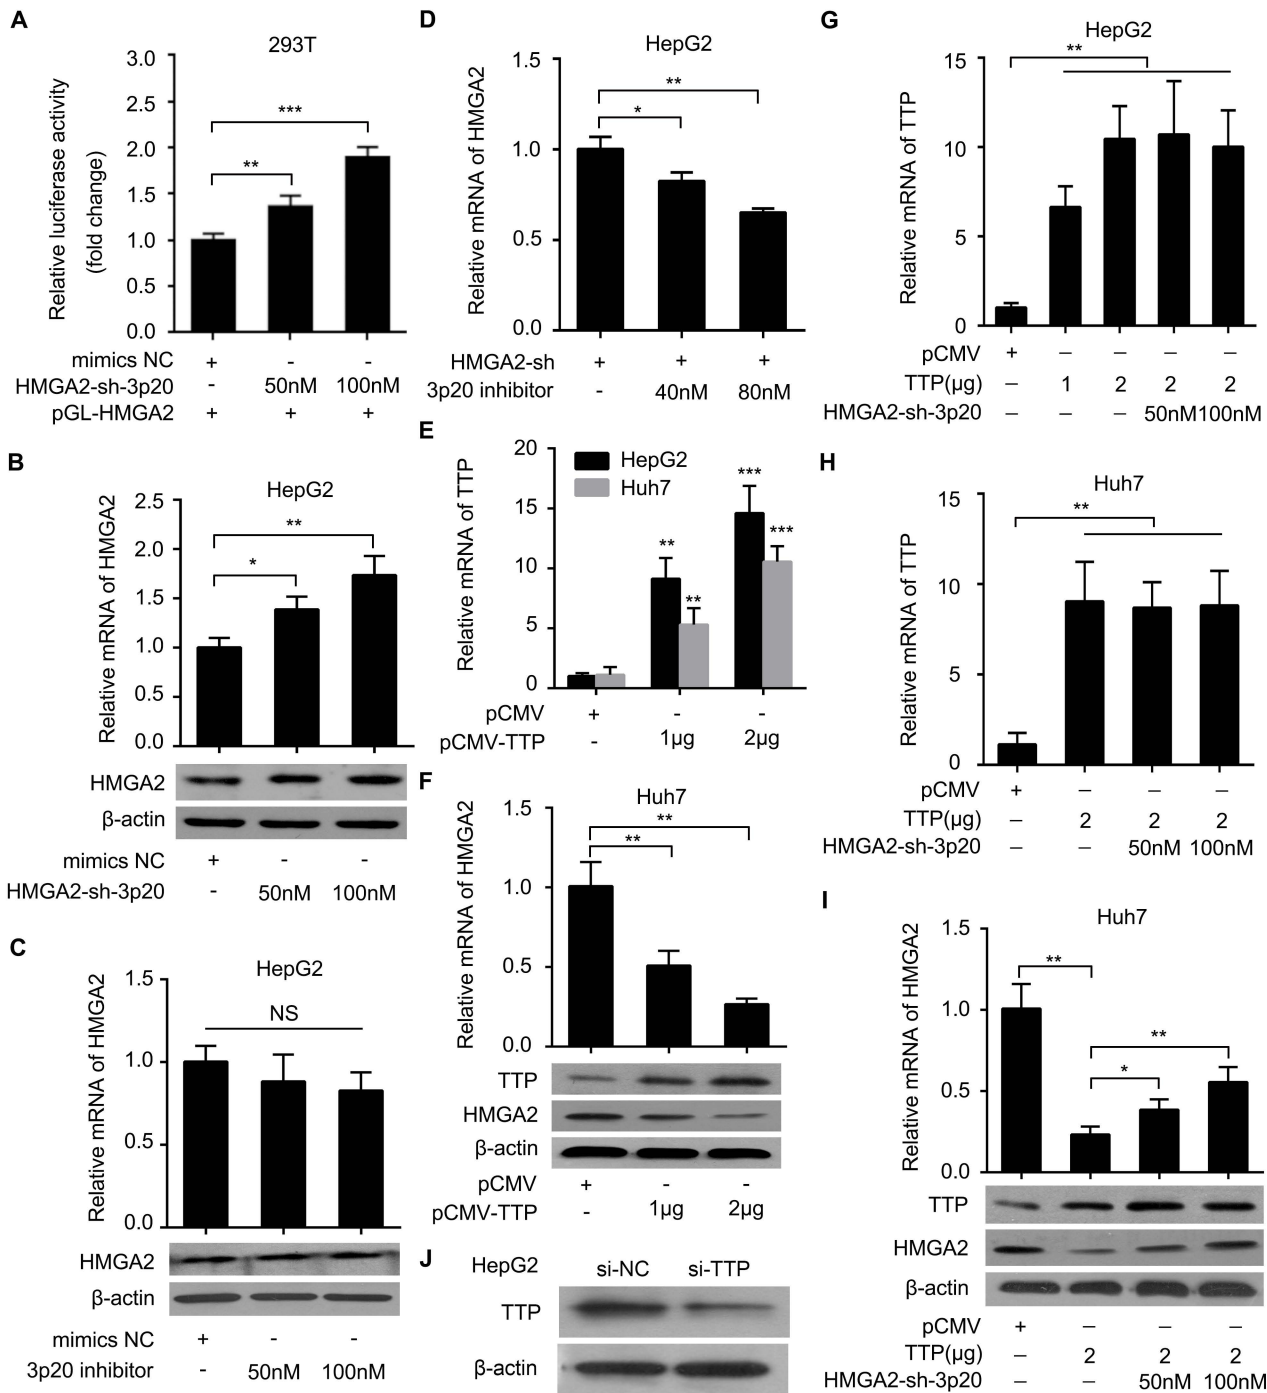

Supplementary Figure S4. HMGA2-sh-3p20 inhibits PTEN by targeting the 3'UTR of PTEN mRNA

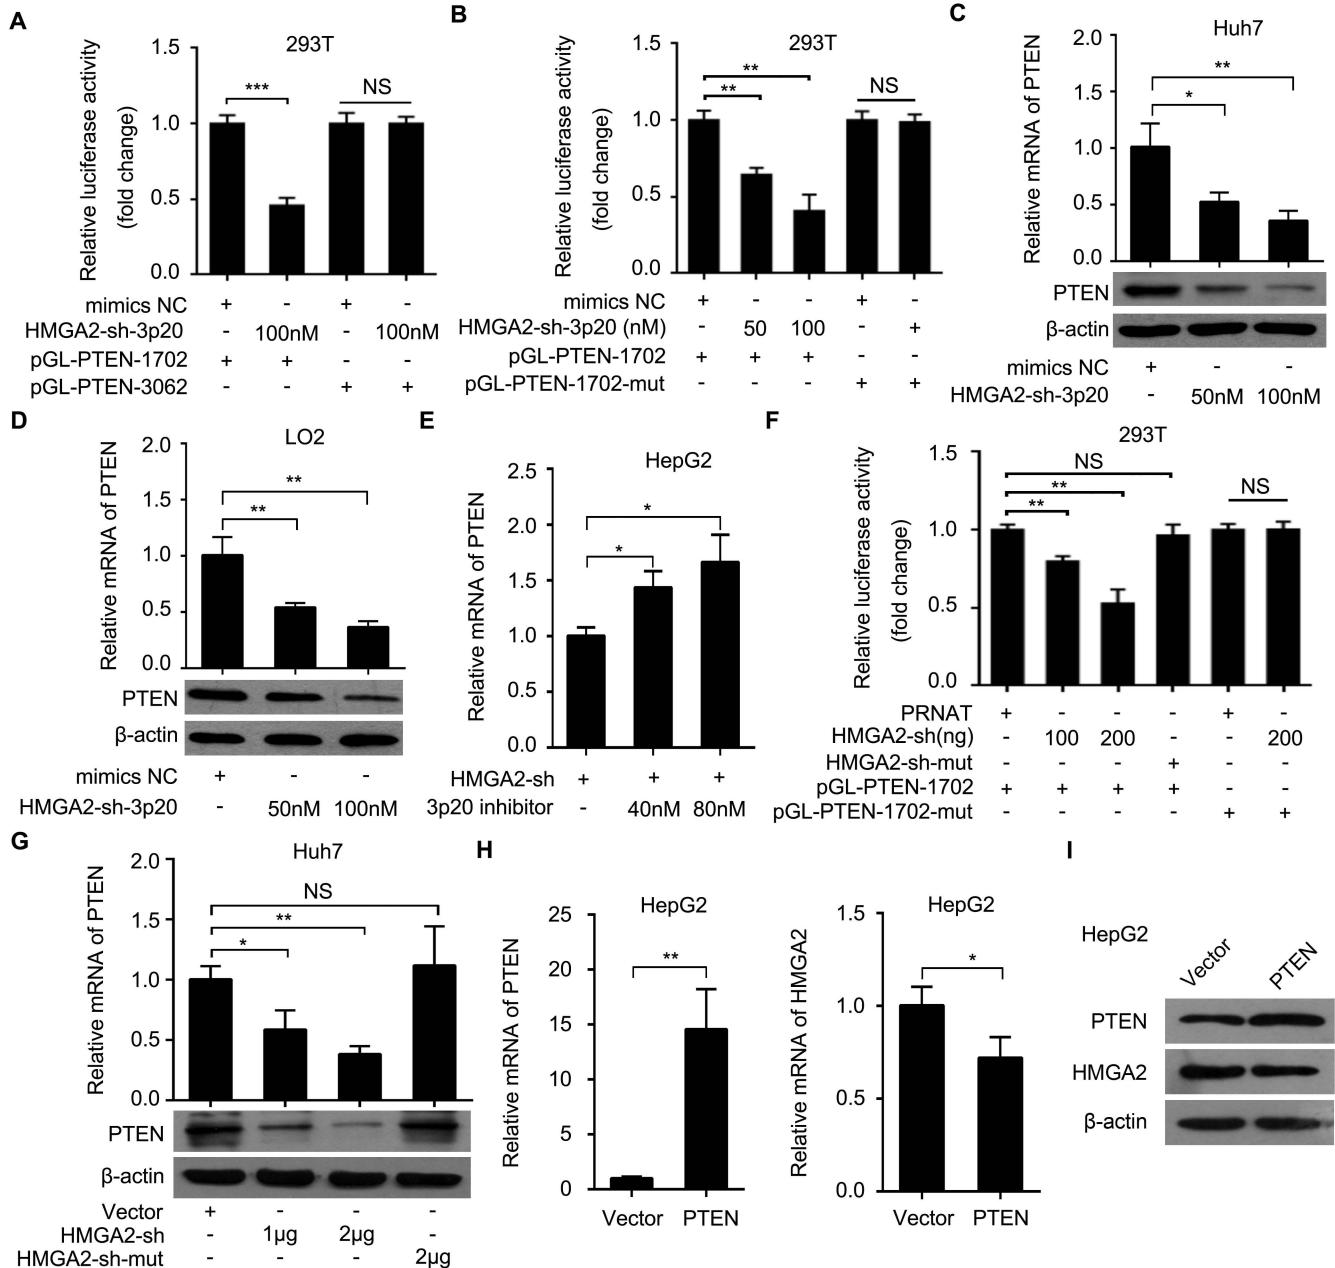

Supplementary Figure S5. HMGA2-sh-3p20 contributes to the proliferation of hepatoma cells

**A**

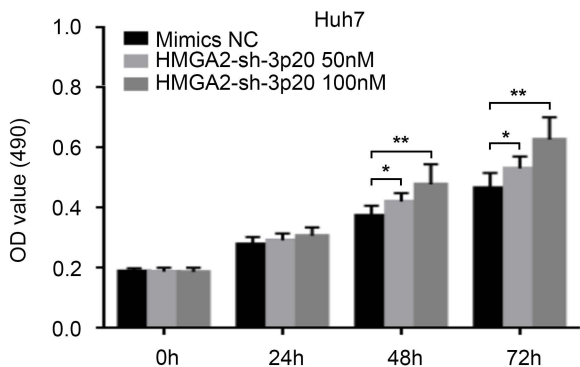

**E**

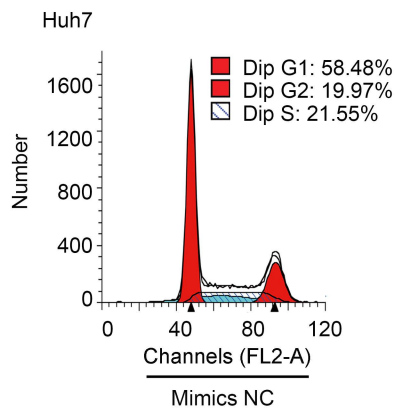

**B**

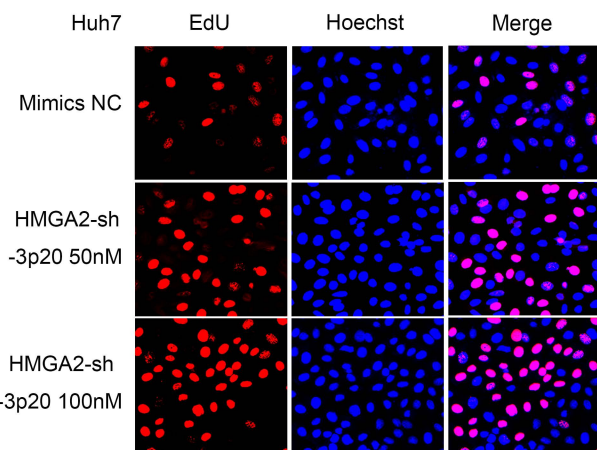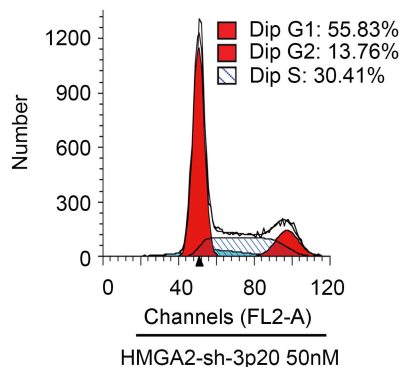

**C**

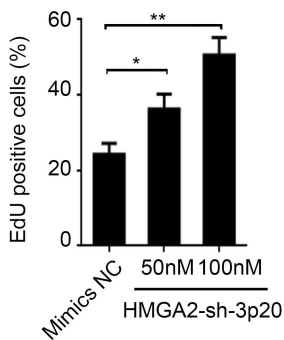

**D**

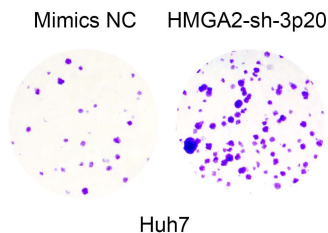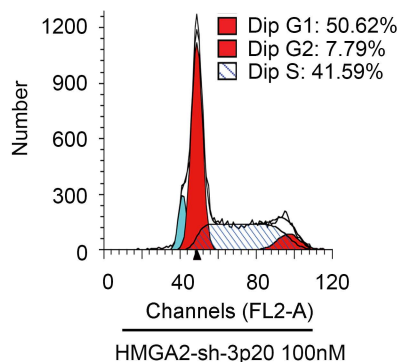

Supplementary Figure 6. Full bands for walking PCR in Figure 2

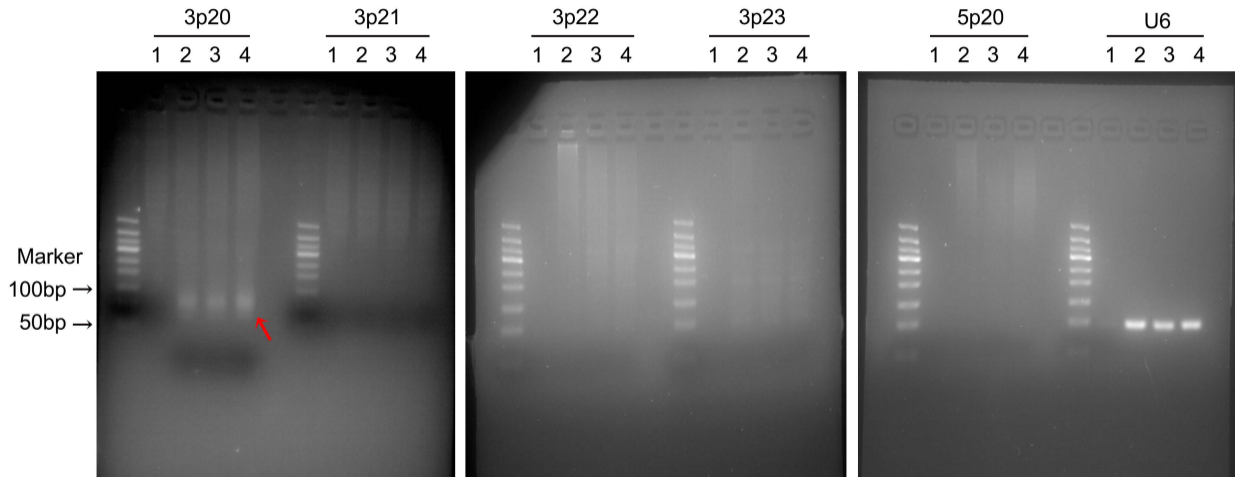



Supplementary Figure 7. Full Blots in Figure 3

Huh7 + HMGA2-sh-3p20

$\beta$ -actin

HMGA2

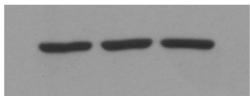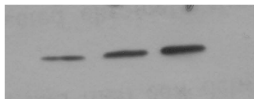

HepG2 + TTP

$\beta$ -actin

TTP

HMGA2

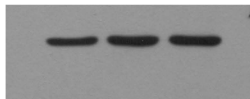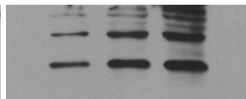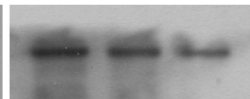

HepG2 + TTP + HMGA2-sh-3p20

$\beta$ -actin

TTP

HMGA2

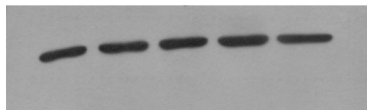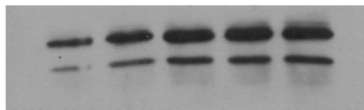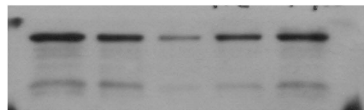

## Supplementary Figure Legends

### **Supplementary Figure S1. A hairpin within HMGA2 mRNA 3'UTR has regulatory**

**function.** (A) The secondary structure of HMGA2 3'UTR was analyzed using RNAstructure. (B) The luciferase activities of pGL3-HMGA2 were examined by luciferase reporter gene assays in 293T cells. (C) The expression of HMGA2 was assessed by qRT-PCR and Western blot analysis in HepG2 cells. Every experiment was repeated three times. Error bars represent s.d. (n=3), \*\* $p < 0.01$ ; \*\*\* $p < 0.001$ , Student's  $t$  test.

### **Supplementary Figure S2. HMGA2-sh-3p20 is cleaved from HMGA2-sh by**

**Drosha/DGCR8 complex and Dicer.** (A) The interference efficiency of si-Dicer was validated by Western blot analysis in HepG2 cells. (B and C) Effect of miR-150 (B) and miR-132 (C) on the levels of HMGA2 mRNA was assessed by qRT-PCR in HepG2 cells. (D) The sequence analysis of HMGA2-sh-3p20 PCR product.

### **Supplementary Figure S3. HMGA2-sh-3p20 upregulates HMGA2 by blocking the**

**TTP-mediated degradation of HMGA2 mRNA.** (A) The luciferase activities of pGL3-HMGA2 were measured by luciferase reporter gene assays in 293T cells. (B) Effect of HMGA2-sh-3p20 on the expression of HMGA2 was detected by qRT-PCR and Western blot in HepG2 cells. (C) Effect of HMGA2-sh-3p20 inhibitor on the expression of HMGA2 was assessed by qRT-PCR and Western blot in HepG2 cells. (D) The expression of HMGA2 was examined by qRT-PCR in HepG2 cells transiently co-transfected with HMGA2-sh and

HMGA2-3p20 inhibitor. (E) The expression of TTP was validated by qRT-PCR in HepG2 and Huh7 cells transiently transfected with TTP, respectively. (F) The expression of HMGA2 was measured by qRT-PCR and Western blot in Huh7 cells. (G and H) The expression of TTP was validated by qRT-PCR in HepG2 and Huh7 cells, respectively. (I) Effect of HMGA2-sh-3p20 on the expression of TTP-mediated HMGA2 was assessed by qRT-PCR and Western blot in Huh7 cells. (J) The interference efficiency of si-TTP was validated by Western blot analysis in HepG2 cells. Every experiment was repeated three times. Error bars represent s.d. (n=3), \*\* $p < 0.01$ ; \*\*\* $p < 0.001$ , Student's *t* test.

**Supplementary Figure S4. HMGA2-sh-3p20 inhibits PTEN by targeting the 3'UTR of**

**PTEN mRNA.** (A) The luciferase activities of pGL3-PTEN-1702 and pGL3-PTEN-3062 were measured by luciferase reporter gene assays in 293T cells. (B) Effect of HMGA2-sh-3p20 on the luciferase activities of pGL3-PTEN-1702 and pGL3-PTEN-1702-mut were assessed by luciferase reporter gene assays in 293T cells. (C and D) Effect of HMGA2-sh-3p20 on the expression of PTEN was examined by qRT-PCR and Western blot in Huh7 and LO2 cells, respectively. (E) The expression of PTEN was assessed by qRT-PCR in HepG2 cells transiently co-transfected with HMGA2-sh and HMGA2-3p20 inhibitor. (F) Effect of HMGA2-sh on the luciferase activities of pGL3-PTEN-1702 and pGL3-PTEN-1702-mut were measured by luciferase reporter gene assays in 293T cells. (G) Effect of HMGA2-sh on the expression of PTEN was assessed by qRT-PCR and Western blot in Huh7 cells. (H) The transfection efficiency of PTEN was validated by qRT-PCR in HepG2 cells. Effect of PTEN on the levels of HMGA2 mRNA was examined by qRT-PCR in HepG2

cells. (I) Effect of PTEN on the expression of HMGA2 was measured by Western blot in HepG2 cells. Every experiment was repeated three times. Error bars represent s.d. (n=3),  $**p<0.01$ ;  $***p<0.001$ , Student's *t* test.

**Supplementary Figure S5. HMGA2-sh-3p20 contributes to the proliferation of hepatoma cells.** (A) Effect of HMGA2-sh-3p20 on proliferation of Huh7 cells was determined by MTT assays. (B and C) Effect of HMGA2-sh-3p20 on proliferation of Huh7 cells was measured by EdU incorporation assays. (D) Effect of HMGA2-sh-3p20 on proliferation of Huh7 cells was measured by colony-formation assays. (E) Effect of HMGA2-sh-3p20 on proliferation of Huh7 cells was tested by flow cytometry assays. Every experiment was repeated three times. Error bars represent s.d. (n=3),  $**p<0.01$ ;  $***p<0.001$ , Student's *t* test.

**Supplementary Figure S6. Full bands images.** Full bands images for PCR in Figure 2G. The template is purified water or cDNA of 293T cells transfected with different plasmid. 1, purified water; 2, without plasmid; 3, empty vector plasmid; 4, PRNAT-HMGA2-sh plasmid.

**Supplementary Figure S7. Full blots images.** Full blots images for Figure 3D, H and I.

## Supplementary Table

**Supplementary Table S1. 3'UTR of mRNAs derived hairpins prediction.**

| No | gene   | genebank ID    | sequence                                                                                                                                        |
|----|--------|----------------|-------------------------------------------------------------------------------------------------------------------------------------------------|
| 1  | HMGA2  | NM_003483.4    | AGCTTGTGGCCAATGGAACAGTAAGAACATCATAAAAT<br>TTTTATATATATAGTTTATTTTTGTGGGAGATAAAATTTTA<br>TAGGACTGTTCTTTGCTGTTGTTGGTCGCAGCTACATAA<br>GACTGGACATTT  |
| 2  | TLR8   | NM_138636.5    | CAGTCCAGGGAAAACAGCTGAAGACCAAGATGGTGAGC<br>TCTGATTGCTTCAGTTGGTCATCAACTATTTTCCCTTGAC<br>TG                                                        |
| 3  | RAC1   | NM_006908.4    | GTGTTGCAGCTTTATAGTTTTTTAAAATATTTTAGATAATT<br>CTTAAACTATGAACCTTCTTAACAT                                                                          |
| 4  | PI3K   | NM_006218.2    | TTAATGAAGAAAAATGCTTGGGGTGAAGGGACTCTTG<br>AGATTTACACCAGAGACTTTTTCTTTTAATAAATCAAAC<br>CTTTTGATGATTTGAGGTTTTATCTGCAGTTTT                           |
| 5  | beclin | NM_003766.3    | GGTTGGGCCCGCTCCCACTGTCCGTGTGGGCTGGAATG<br>AGATTAACACTGCCTGGGGACAGGCGGCT                                                                         |
| 6  | SRC    | NM_005417.4    | GTGATGTTTGACCTTCAGAGCCAGCCGGCTATGAAAGG<br>GAGCGAGCCCCCTCGGCTCTGGAGGCAATCAAGCAGACA<br>T                                                          |
| 7  | JUN    | NM_002228.3    | TTGGGGAGGGGCGGCAGGAGGGAGGTTTGTGAGAGCG<br>AGGCTGAGCCTACAGATGAACTCTTCTGGCCTGCCTTC<br>GTAA                                                         |
| 8  | LATS   | NM_001270519.1 | GCTGTGCTGCTCCGCAGACCACCGCTGGGGCGGAATG<br>GGGCCGATGACCTGAAGGCCACCCCTTCTTCAGCGCC<br>ATTGACTTCTCCAGTGACATCGGAAGCAGCCAGC                            |
| 9  | CTBP1  | NM_001012614.1 | CAACAAAAAGAAAACCTGAAGGAGCATTTGGAAGTCAA<br>TTTGAGGTTTTTTTTTTTGT                                                                                  |
| 10 | CEBPB  | NM_001285878.1 | CGCGGCCCCCGCGCGTCCCCCTGCCGGCCGGGGCTG<br>AGACTCCGGGGAGCGCCCGCGCCCGCGCCCTCGCCCC<br>GCCCCGGCGGCGCCGGCAAACCTTTGGCACTGGGGCA<br>CTTGGCAGCGCGGGGAGCCCG |
| 11 | VASP   | NM_003370.3    | AGCTATTTAAGGGGAGGGGATGTCTCACCGGGCTGGGG<br>GTGAGATATCCCCCAGGGACTCCCCTTCCCTCT<br>GGCT                                                             |
| 12 | DUSP5  | NM_004419.3    | CCTCCGAGGCCTGCGCGACCCACCTACACTACAAATGG<br>ATCCCTGTGGAAGACAGCCACACGGCTGACATTAGCTC<br>CCACTTTCAAGAAGCAATAGACTTCATTGACTGTGTCAG<br>GGAAA            |
| 13 | PABP   | NM_002568.3    | ATTTTGTAAATCTTTACTGTGGAATAGCTCAGAATGTCA<br>GTTCTGTTTTAAGTAACAGAATTGATAACTGAGCAAGG<br>AAACGTAATTTGGATTATAAAAT                                    |

|    |          |                |                                                                                                                                         |
|----|----------|----------------|-----------------------------------------------------------------------------------------------------------------------------------------|
| 14 | CTNNBIP1 | NM_001012329.1 | GTGTGCATGTGCTGTGTGAGTGAGCACACCCGTGTGCAC<br>ACTCATAACATGTGCACACGTGTGCATGTGCTGTGTGA<br>GTGAGCACACCCGTGTGCACACTCATAACATGTGCAC<br>ACA       |
| 15 | CASP3    | NM_004346.3    | ATGATGACATGGCGTGCATAAAATACCAGTGGAGGCC<br>GACTTCTTGTATGCATACTCCACAGCACCTGGTTATTA                                                         |
| 16 | E2F1     | NM_005225.2    | GTCCCACAAGGCCAGGGCAGTGCCTGCTCCAGAATC<br>TGGTGCTCTGACCAGGCCAGGTGGGGAGGCTTTGGCTG<br>GCTGGGCGTGTAGGAC                                      |
| 17 | MSL2     | NM_001145417.1 | AGTCTTTATTTTGAATATGCTCCTAGTTTTTTTTTAGGGT<br>GCTGTTTATTATGAAGGCTTCTTTATAGAGGCCTAATAA<br>GAATGCCTTTTTATAAAGCCTGTGCATTTAGGTAGGTTG<br>A     |
| 18 | IL-6     | NM_000600.3    | ATTTCTTGAAAGTGTAGGCTTACCTCAAATAAATGGCT<br>AACTTATACATATTTTTAAAGAAATATTTATATTGTATTT<br>ATATAATGTATAAATGGTTTTTATACCAATAAATGGCAT<br>TTTAAA |
| 19 | NIK      | NM_003954.4    | CCCTGCCCTGCCCTGGCCAGAGGGTACTGCCGACGGC<br>ACTTTGCACTCTGATGACCTCAAAGCACTTTCATGGCTG<br>CCCTCTGGCAGGGCAGGG                                  |
| 20 | c-Fos    | NM_005252.3    | TTTTTATTTTATTTTTCUACCTTGAGGTCTTTTGACAT<br>GTGGAAAGTGAATTTGAATGAAAA                                                                      |
| 21 | IP3R     | NM_001099952.2 | AGTTTTATACTGTATGTATATGATTGCTACTCTAAAGGT<br>TTGGATATATGTATTGTAATTAGAATTG                                                                 |
| 22 | GRB2     | NM_002086.4    | None                                                                                                                                    |
| 23 | LIN28A   | NM_024674.4    | None                                                                                                                                    |
| 24 | HIF1A    | NM_001243084.1 | None                                                                                                                                    |
| 25 | BCL2     | NM_000633.2    | None                                                                                                                                    |
| 26 | NFKB2    | NM_001077494.3 | None                                                                                                                                    |
| 27 | KRAS     | NM_004985.4    | None                                                                                                                                    |
| 28 | MTOR     | NM_004958.3    | None                                                                                                                                    |
| 29 | PRRT2    | XM_006721006.1 | None                                                                                                                                    |
| 30 | PIK3CA   | NM_006218.2    | None                                                                                                                                    |
| 31 | RBFOX1   | NM_001142333.1 | None                                                                                                                                    |
| 32 | RBFOX2   | NM_001031695.2 | None                                                                                                                                    |
| 33 | BID      | NM_001196.3    | None                                                                                                                                    |
| 34 | MAP3K14  | NM_003954.4    | None                                                                                                                                    |
| 35 | IKBKB    | NM_001190720.2 | None                                                                                                                                    |
| 36 | EEF2K    | NM_013302.3    | None                                                                                                                                    |
| 37 | RICTOR   | NM_001285439.1 | None                                                                                                                                    |
| 38 | PPARA    | NM_001001928.2 | None                                                                                                                                    |
| 39 | TESK2    | NM_007170.2    | None                                                                                                                                    |
| 40 | CAT      | NM_001752.3    | None                                                                                                                                    |

|    |         |                |      |
|----|---------|----------------|------|
| 41 | TRIP10  | NM_001288962.1 | None |
| 42 | WAS     | NM_000377.2    | None |
| 43 | TIAM1   | NM_003253.2    | None |
| 44 | PTK2    | NM_001199649.1 | None |
| 45 | NCK2    | NM_001004720.2 | None |
| 46 | NCK1    | NM_001190796.1 | None |
| 47 | FASCIN1 | NM_003088.3    | None |
| 48 | MYLK    | NM_053025.3    | None |
| 49 | MLC1    | NM_015166.3    | None |
| 50 | CAP2    | NM_006366.2    | None |
| 51 | TMOD1   | NM_001166116.1 | None |
| 52 | DSTN    | NM_001011546.1 | None |
| 53 | PDXP    | NM_020315.4    | None |
| 54 | SSH3    | NM_017857.3    | None |
| 55 | KRIT1   | NM_001013406.1 | None |
| 56 | FLNC    | NM_001127487.1 | None |
| 57 | FLNB    | NM_001164317.1 | None |
| 58 | TRIO    | NM_007118.2    | None |
| 59 | CIR1    | NM_004882.3    | None |
| 60 | RHOA    | NM_001664.2    | None |
| 61 | AKT1    | NM_001014431.1 | None |
| 62 | F2RL2   | NM_001256566.1 | None |
| 63 | ZBTB4   | NM_001128833.1 | None |
| 64 | CSNK2A1 | NM_001895.3    | None |
| 65 | NKD2    | NM_001271082.1 | None |
| 66 | TAB1    | NM_006116.2    | None |
| 67 | TAB2    | NM_015093.4    | None |
| 68 | RARA    | NM_000964.3    | None |
| 69 | CSNK1A1 | NM_001025105.2 | None |
| 70 | SFRP1   | NM_003012.4    | None |
| 71 | PPOX    | NM_000309.3    | None |
| 72 | FYN     | NM_002037.5    | None |
| 73 | CSNK2B  | NM_001282385.1 | None |
| 74 | CAMK    | NM_001204492.1 | None |
| 75 | EGR1    | NM_001964.2    | None |
| 76 | MEF2C   | NM_002397.4    | None |
| 77 | JNK1    | NM_002750.3    | None |
| 78 | JNK2    | NM_139068.2    | None |
| 79 | MKK3    | NM_002756.4    | None |
| 80 | MKK4    | NM_003010.3    | None |
| 81 | MKK6    | NM_002758.3    | None |
| 82 | RAP1    | NM_001010935.1 | None |
| 83 | VAV     | NM_005428.3    | None |

|     |         |                |      |
|-----|---------|----------------|------|
| 84  | Bam32   | AF186022.1     | None |
| 85  | CD19    | NM_001178098.1 | None |
| 86  | CD22    | NM_001771.3    | None |
| 87  | SHP-1   | NM_002831.5    | None |
| 88  | LYN     | NM_002350.3    | None |
| 89  | SYK     | NM_003177      | None |
| 90  | BTK     | NM_000061.2    | None |
| 91  | MALT1   | NM_006785.3    | None |
| 92  | CARMAL  | NM_032415.5    | None |
| 93  | Stim1   | NM_001277961.1 | None |
| 94  | Orai1   | NM_032790.3    | None |
| 95  | Calpain | AJ242832.1     | None |
| 96  | Zap70   | NM_001079.3    | None |
| 97  | LCK     | NM_001042771.2 | None |
| 98  | REI     | NM_001123041.2 | None |
| 99  | CAMK4   | NM_001744.4    | None |
| 100 | p65     | AJ002425.2     | None |
| 101 | ABCC2   | NM_000392.3    | None |
| 102 | ATF4    | NM_001675.4    | None |
| 103 | CAST    | NM_001042440.3 | None |
| 104 | CCNA1   | NM_001111045.1 | None |
| 105 | CD99    | NM_001122898.1 | None |
| 106 | CYBB    | NM_000397.3    | None |
| 107 | DOK1    | NM_001197260.1 | None |
| 108 | EDN1    | NM_001168319.1 | None |
| 109 | FOS     | NM_005252.3    | None |
| 110 | GABRE   | NM_004961.3    | None |
| 111 | HSPA5   | NM_005347.4    | None |
| 112 | MAP2K2  | NM_030662.3    | None |
| 113 | MCM6    | NM_005915.5    | None |
| 114 | MYH10   | NM_001256012.1 | None |
| 115 | ORC3    | XM_005248704.1 | None |
| 116 | PIAS1   | NM_016166.1    | None |
| 117 | PIK3R4  | NM_014602.2    | None |
| 118 | PRKDC   | NM_001081640.1 | None |
| 119 | SMAD6   | NM_001142861.2 | None |
| 120 | WNT5B   | NM_030775.2    | None |
| 121 | FOXO4   | NM_001170931.1 | None |
| 122 | PDE3A   | NM_000921.4    | None |
| 123 | PDE2A   | NM_002599.4    | None |
| 124 | YARS    | NM_003680.3    | None |
| 125 | SOAT1   | NM_003101.5    | None |
| 126 | GSS     | NM_000178      | None |



|     |        |                |      |
|-----|--------|----------------|------|
| 127 | GOT2   | NM_002080.3    | None |
| 128 | HERC1  | NM_003922.3    | None |
| 129 | WWP1   | NM_007013      | None |
| 130 | NEDD4  | NM_001284338.1 | None |
| 131 | smad1  | NM_005900      | None |
| 132 | PP2A   | L42373.1       | None |
| 133 | Axin   | NM_003502.3    | None |
| 134 | APC    | M74088         | None |
| 135 | GSK-3  | NM_019884.2    | None |
| 136 | SARA   | AF104304.1     | None |
| 137 | NuMB   | NM_001005743   | None |
| 138 | KDM5A  | NM_001042603.2 | None |
| 139 | CSL    | NM_005349.3    | None |
| 140 | SKIP   | AB036829.1     | None |
| 141 | HAT    | AK290289.1     | None |
| 142 | O-Fut  | BC000582.2     | None |
| 143 | Furin  | NM_002569.3    | None |
| 144 | Notch  | NM_017617      | None |
| 145 | Ihh    | NM_002181      | None |
| 146 | shh    | NM_000193      | None |
| 147 | smad2  | NM_001135937.2 | None |
| 148 | smad3  | NM_005902.3    | None |
| 149 | smad4  | NM_005359      | None |
| 150 | smad5  | NM_005903.5    | None |
| 151 | smad6  | BC052569.1     | None |
| 152 | MAVS   | NM_001206491.1 | None |
| 153 | TLR9   | NM_017442.3    | None |
| 154 | TLR7   | NM_016562.3    | None |
| 155 | TLR3   | NM_003265.2    | None |
| 156 | TRIF   | NM_0182919.3   | None |
| 157 | SOCS-1 | NM_003745.1    | None |
| 158 | IRAK-4 | NM_001114182.2 | None |
| 159 | IRAK-M | NM_001142523.1 | None |
| 160 | MYD88  | NM_001172566.1 | None |
| 161 | TIRAP  | NM_001039661.1 | None |
| 162 | ELKS   | NM_0178039.2   | None |
| 163 | TAX    | NM_005076.3    | None |
| 164 | COT    | NM_001143935.1 | None |
| 165 | CKII   | NM_001895.3    | None |
| 166 | smurf2 | NM_022739.3    | None |
| 167 | LIMK   | NM_001204426.1 | None |
| 168 | TF     | NM_001063.3    | None |
| 169 | BMI1   | NM_005180.8    | None |

|     |        |                |      |
|-----|--------|----------------|------|
| 170 | Rad51  | NM_001164269.1 | None |
| 171 | BORA   | NM_001286746.1 | None |
| 172 | AURA   | NM_003600.2    | None |
| 173 | P90RSK | NM_001006932.1 | None |
| 174 | DNA-PK | NM_001081640.1 | None |
| 175 | HRI    | NM_001134335.1 | None |
| 176 | GADD34 | NM_014330.3    | None |
| 177 | PDK3   | NM_001142386.2 | None |
| 178 | Raf    | NM_014943.3    | None |
| 179 | MDM2   | NM_001145337.2 | None |
| 180 | stat3  | NM_003150.3    | None |
| 181 | 4-Oct  | NM_001173531.2 | None |
| 182 | MAPK   | NM_002745.4    | None |
| 183 | AP1    | NM_002228.3    | None |
| 184 | NOS    | NM_000620.4    | None |
| 185 | MP1    | NM_001243736.1 | None |
| 186 | ATF1   | NM_005171.4    | None |
| 187 | PCNA   | NM_002592.2    | None |
| 188 | NANOG  | XM_005253484.2 | None |
| 189 | KLF4   | NM_004235.4    | None |
| 190 | HBXIP  | NM_006402.2    | None |
| 191 | MYC    | NM_002467.4    | None |
| 192 | F3     | NM_001178096.1 | None |
| 193 | BCR    | NM_004327.3    | None |
| 194 | LEP    | NM_000230.2    | None |
| 195 | PTGS2  | NM_000963.3    | None |
| 196 | JAK2   | NM_004972.3    | None |

**Supplementary Table S2. List of siRNAs used in this paper.**

| Gene                       | Sequence (5'-3')       |
|----------------------------|------------------------|
| si-Dicer                   | UUUGUUGCGAGGCUGAUUC    |
| si-TTP                     | GACGGAACUCUGUCACAAG    |
| si-NC                      | AAUGGUCAUGGUCUUAUUC    |
| HMGA2-sh-3p20              | AAAUUUUUAUAGGACUGUUCU  |
| mimics NC                  | UUCUUCGAAGGUGUGACGU    |
| HMGA2-sh-3p20 inhibitor    | AGAACAGUCCUAUAAAAUUUA  |
| HMGA2-sh-3p20 inhibitor NC | CAGUACUUUUGUGUAGUACAA  |
| miR-150                    | UCUCCCAACCCUUGUACCAGUG |
| miR-132                    | UAACAGUCUACAGCCAUGGUCG |

**Supplementary Table S3. Clinical characteristics of HCC samples.**

| <b>No.</b> | <b>Age</b> | <b>Sex</b> | <b>Organ</b> | <b>Pathology diagnosis</b> |
|------------|------------|------------|--------------|----------------------------|
| 01         | 50         | M          | Liver        | hepatocellular carcinoma   |
| 02         | 57         | M          | Liver        | hepatocellular carcinoma   |
| 03         | 61         | F          | Liver        | hepatocellular carcinoma   |
| 04         | 51         | F          | Liver        | hepatocellular carcinoma   |
| 05         | 56         | M          | Liver        | hepatocellular carcinoma   |
| 06         | 60         | M          | Liver        | hepatocellular carcinoma   |
| 07         | 54         | M          | Liver        | hepatocellular carcinoma   |
| 08         | 36         | M          | Liver        | hepatocellular carcinoma   |
| 09         | 62         | F          | Liver        | hepatocellular carcinoma   |
| 10         | 57         | M          | Liver        | hepatocellular carcinoma   |
| 11         | 45         | M          | Liver        | hepatocellular carcinoma   |
| 12         | 54         | M          | Liver        | hepatocellular carcinoma   |
| 13         | 68         | M          | Liver        | hepatocellular carcinoma   |
| 14         | 52         | M          | Liver        | hepatocellular carcinoma   |
| 15         | 68         | F          | Liver        | hepatocellular carcinoma   |
| 16         | 59         | M          | Liver        | hepatocellular carcinoma   |
| 17         | 63         | M          | Liver        | hepatocellular carcinoma   |
| 18         | 61         | M          | Liver        | hepatocellular carcinoma   |
| 19         | 56         | F          | Liver        | hepatocellular carcinoma   |
| 20         | 35         | F          | Liver        | hepatocellular carcinoma   |
| 21         | 40         | M          | Liver        | hepatocellular carcinoma   |
| 22         | 75         | M          | Liver        | hepatocellular carcinoma   |
| 23         | 53         | M          | Liver        | hepatocellular carcinoma   |
| 24         | 60         | F          | Liver        | hepatocellular carcinoma   |
| 25         | 26         | M          | Liver        | hepatocellular carcinoma   |
| 26         | 51         | M          | Liver        | hepatocellular carcinoma   |
| 27         | 72         | F          | Liver        | hepatocellular carcinoma   |
| 28         | 43         | M          | Liver        | hepatocellular carcinoma   |
| 29         | 26         | M          | Liver        | hepatocellular carcinoma   |
| 30         | 56         | M          | Liver        | hepatocellular carcinoma   |
| 31         | 60         | M          | Liver        | hepatocellular carcinoma   |
| 32         | 65         | M          | Liver        | hepatocellular carcinoma   |
| 33         | 43         | M          | Liver        | hepatocellular carcinoma   |
| 34         | 41         | M          | Liver        | hepatocellular carcinoma   |
| 35         | 45         | M          | Liver        | hepatocellular carcinoma   |

**Supplementary Table S4. List of primers used in this paper.**

| Gene                                               | Primer  | Sequence(5'-3')                     |
|----------------------------------------------------|---------|-------------------------------------|
| <b>Primers for plasmid construction</b>            |         |                                     |
| PRNAT-HM-sh                                        | forward | CGCGGATCCAGCTTGTGGCCAATGGAAC        |
|                                                    | reverse | CGGGGTACCGAACAAAGAATAAAGTTAGAAG     |
| pCMV-TTP                                           | forward | CCGGAATTCATGGCCAACCGTTACACCA        |
|                                                    | reverse | CCCAAGCTTTCACCTCAGAAACAGAGATGCG     |
| pCMV-PTEN                                          | forward | CCGGAATTCATGACAGCCATCATCAAAGA       |
|                                                    | reverse | CCCAAGCTTTTTTTCATGGTGTTTTATCCCT     |
| <b>Primers for luciferase reporter gene assays</b> |         |                                     |
| pGL-HMGA2                                          | forward | TGCTCTAGAAGCTTGTGGCCAATGGAAC        |
|                                                    | reverse | GGGGGCCGCGCCGAACAAAGAATAAAGTTAGAAG  |
| pGL-PTEN-1702                                      | forward | TGCTCTAGAAGCTGCATACGATTTTAAGCG      |
|                                                    | reverse | GGGGGCCGCGCCAATGAAACTGACAAGGTATGGA  |
| pGL-PTEN-3062                                      | forward | TGCTCTAGACAAAGTGCCTCGTTTACCT        |
|                                                    | reverse | GGGGGCCGCGCCCAAACACAATAACAAATGGACA  |
| pGL-PTEN-1702-mut                                  | forward | GTTTCTTAATGGATATTTTAACCATTTTCAATAAC |
|                                                    | reverse | GTTATTGAAAATGGTTAAAATATCCATTAAGAAAC |
| <b>Primers for HMGA2-sh-3p20 Detection</b>         |         |                                     |
| HMGA2-sh-3p20                                      | forward | AAATTTTATAGGACTGTTCT                |
| HMGA2-sh-3p21                                      | forward | AATTTTATAGGACTGTTCTT                |
| HMGA2-sh-3p22                                      | forward | ATTTTATAGGACTGTTCTTT                |
| HMGA2-sh-3p23                                      | forward | TTTTATAGGACTGTTCTTTG                |
| HMGA2-sh-5P23                                      | forward | TAAGAACATCATAAAATTTT                |
| HMGA2-sh-5p22                                      | forward | GTAAGAACATCATAAAATTT                |
| HMGA2-sh-5P21                                      | forward | AGTAAGAACATCATAAAATT                |
| HMGA2-sh-5P20                                      | forward | CAGTAAGAACATCATAAAAT                |
| qRT-PCR                                            | reverse | GCGAGCACAGAATTAATACGAC              |
| U6                                                 | forward | AGAGCCTGTGGTGTCCG                   |
|                                                    | reverse | CATCTTCAAAGCACTTCCCT                |
| <b>Primers for RT-qPCR</b>                         |         |                                     |
| HMGA2                                              | forward | TGGGAGGAGCGAAATCTAA                 |
|                                                    | reverse | GGTGAAGTCAAGCCGAAG                  |
| TTP                                                | forward | CTGACTGCCATCTACGAGAG                |
|                                                    | reverse | GAGTTCCGTCTTGTATTTGGG               |
| PTEN                                               | forward | GTCACTGCTTGTGTTTGC                  |
|                                                    | reverse | TTCTTTGTTGATAGCCTCCAC               |
| GAPDH                                              | forward | AACGGATTTGGTCGTATTG                 |
|                                                    | reverse | GGAAGATGGTGTATGGGATT                |
| <b>Primers for RIP-qPCR</b>                        |         |                                     |
| HMGA2                                              | forward | TGGGAGGAGCGAAATCTAA                 |
|                                                    | reverse | GGTGAAGTCAAGCCGAAG                  |

| <b>Primers for miRNAs</b> |         |                        |
|---------------------------|---------|------------------------|
| miR-410                   | forward | AATATAACACAGATGGCCTGT  |
| miR-590                   | forward | TAATTTTATGTATAAGCTAGT  |
| miR-150                   | forward | TCTCCAACCCTTGTACCAGTG  |
| miR-132                   | forward | TAACAGTCTACAGCCATGGTCG |
| miR-212                   | forward | TAACAGTCTCCAGTCACGGCC  |
| miR-145                   | forward | GTCCAGTTTTCCAGGAATCCCT |
| miR-186                   | forward | CAAAGAATTCTCCTTTTGGGCT |
| qRT-PCR                   | reverse | GCGAGCACAGAATTAATACGAC |

**Supplementary Table S5. List of antibodies used in this paper.**

| <b>Gene</b>                        | <b>Manufacture</b> | <b>Catalog Number</b> |
|------------------------------------|--------------------|-----------------------|
| HMGA2 Polyclonal antibody          | Genetex            | GTX100519             |
| Drosha Polyclonal antibody         | Proteintech        | 55001-1-AP            |
| DGCR8 Monoclonal antibody          | Proteintech        | 60084-1-Ig            |
| Dicer Polyclonal antibody          | Proteintech        | 20567-1-AP            |
| TTP Polyclonal antibody            | Proteintech        | 12737-1-AP            |
| PTEN Monoclonal Antibody           | Proteintech        | 60300-1-Ig            |
| $\beta$ -actin Monoclonal Antibody | Sigma-Aldrich      | A2228                 |
| Ki67 Monoclonal antibody           | Thermo             | RM-9106-R7            |
